# Supplementary material for: Identification and Characterization of New Variants in FOXRED1 Gene Expands the Clinical Spectrum Associated with Mitochondrial Complex I Deficiency
Source: PubMed Central journal article supplement (PMC6723710; doi:10.3390/jcm8081262), 2019-08-20
Supplement: jcm-08-01262-s001.pdf [file jcm-08-01262-s001.pdf]

**Table S1. Clinical features observed in the 6 patients described so far harboring pathogenic variants in *FOXRED1*.**

| Patient | Variants FOXRED1                                                         | Prenatal period                       | Onset age       | Onset clinical symptoms                                            | Evolutionary symptoms      |                |               |                                                                                                      |                                                                  |                                          |                                                              |                         |                                                                                                 | Survival         |
|---------|--------------------------------------------------------------------------|---------------------------------------|-----------------|--------------------------------------------------------------------|----------------------------|----------------|---------------|------------------------------------------------------------------------------------------------------|------------------------------------------------------------------|------------------------------------------|--------------------------------------------------------------|-------------------------|-------------------------------------------------------------------------------------------------|------------------|
|         |                                                                          |                                       |                 |                                                                    | Lactic/ Metabolic acidosis | Epilepsy       | Muscular tone | MRI                                                                                                  | Visual                                                           | Respiratory                              | Cardiovascular                                               | Others                  | Psychomotor development                                                                         |                  |
| 1       | c.920G>A (p.Gly307Glu) / c.733+1G>A                                      | IUGR                                  | 2m              | Hypotonia<br>Developmental delay                                   | Yes (+++)                  | Yes refractory | ↓             | Normal (2m,4y,7y3m)                                                                                  | Latent strabismus of right eye                                   | Bronchospasm episodes in infant          | Normal                                                       | AEP normal              | IQ: 48                                                                                          | Alive (15y)      |
| 2       | c.920G>A (p.Gly307Glu) / c.733+1G>A                                      | NI                                    | 4y              | Clumsiness                                                         | With exercise (+)          | No             | Normal        | Normal                                                                                               | Normal                                                           | Normal                                   | Normal                                                       | Learning disorders      | IQ: 99                                                                                          | Alive (19y)      |
| 3       | c.694C>T (p.Gln232X) / c.1289A>G (p.Asn430Ser) <sup>18</sup>             | -                                     | Neonatal period | Premature; Hypoglycemia<br>Congenital lactic acidosis              | No (only ↑ lactate in LCR) | Yes            | ↓             | Decreased attenuation in the putamen and cerebellar atrophy (6y)                                     | Normal                                                           | Normal                                   | Normal                                                       | Normal                  | Gradually loss of motor skills; wheelchair; no expressive language; understands simple commands | Alive (22y)      |
| 4       | c.1054 C>T (p.Arg352Trp) / c.1054 C>T (p.Arg352Trp) <sup>19</sup>        | NI                                    | Neonatal period | Truncal hypotonia<br>Poor feeding                                  | Yes                        | Yes            | ↓             | Delayed myelination<br>ventricular dilatation; abnormal signal in the thalami and basal ganglia (8m) | Eye movements have always been roving<br>bilateral optic atrophy | Normal                                   | Mild non-obstructive left ventricular hypertrophy            | Persistent hepatomegaly | Psychomotor retardation                                                                         | Alive (10y)      |
| 5       | c.1308G>A (p.Val421Met) / c.1308G>A (p.Val421Met) <sup>20</sup>          | ND                                    | ND              | ND                                                                 | ND                         | Yes            | NA            | NA                                                                                                   | NA                                                               | NA                                       | NA                                                           | NA                      | Severe psychomotor retardation                                                                  | Alive (¿)        |
| 6       | c.612_615dupA CTG (p.Ala206fsX15) / c.874G>A (p.Gly292Arg) <sup>21</sup> | IUGR; Cerebral intraventricular cysts | Neonatal period | Congenital lactic acidosis.<br>Seizures.<br>Pulmonary hypertension | Yes                        | Yes            | ↓             | Large periventricular cysts, edematous white matter, delayed myelination (13d)                       | --                                                               | Persistent severe pulmonary hypertension | Dilated right ventricle and atrium; patent ductus arteriosus | -                       | -                                                                                               | Death (3 months) |

*IUGR: Intrauterine Growth Restriction; ADHD: Attention Deficit Hyperactivity Disorder; NI: No Incidences; ND: Not Described; MRI: Magnetic Resonance Imaging; IQ: intellectual coefficient; AEP: Auditory Evoked Potentials; y: year; m: month; d: days*

**Table S2. *In silico* analysis to predict *FOXRED1* variants pathogenicity according to AMCG guidelines**

| Variants<br><b>FOXRED1</b><br>(NM_017547.3) | Inheritance | Population frequencies |         |                 | Conservation Scores |             |                | Prediction Scores |                    |        | Functional |         | Splicing |                              |
|---------------------------------------------|-------------|------------------------|---------|-----------------|---------------------|-------------|----------------|-------------------|--------------------|--------|------------|---------|----------|------------------------------|
|                                             |             | gnomAD                 | ExAC    | 1000<br>Genomes | GERP                | PhyloP20way | phastCons20way | DANN              | Mutation<br>Taster | FATHMM | SIFT       | Provean | dbscSNV  | HSF                          |
| c.920G>A<br>(p.Gly307Glu)                   | Father      | 0.000152               | 0.0001  | -               | 5.63                | 0.953       | 0.8119         | 0.9958            | DC                 | D      | T          | D       | NA       | NA                           |
| c.733+1G>A                                  | Mother      | 4.06e <sup>-5</sup>    | 0.00005 | -               | 5.76                | 0.943       | 0.9919         | 0.9926            | DC                 | D      | NA         | NA      | 0.999    | Break<br>WT<br>donor<br>site |

*DC: Disease causing; D: Damaging; T: Tolerated; NA: Not Applicable*
